# Supplementary material
Source: PubMed Central journal article supplement (PMC10287148)
Supplement: esac067_suppl_supplementary_material.pdf [file esac067_suppl_supplementary_material.pdf]

**Supplemental Information: Evolutionary potential mitigates extinction risk in the endangered southwestern willow flycatcher**

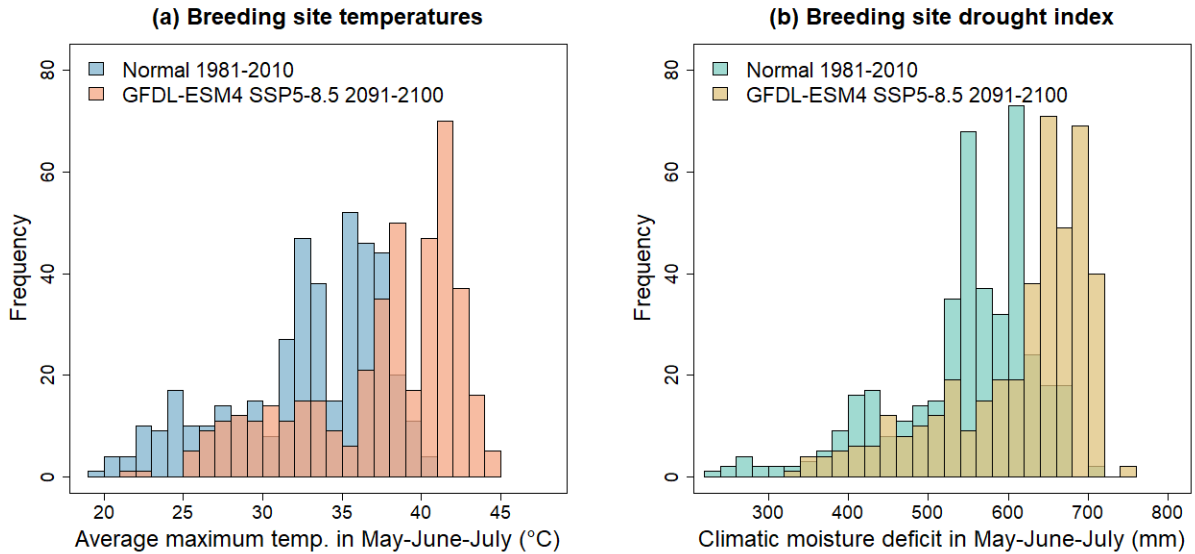

**Figure S1.** Frequency of (a) average maximum temperatures and (b) climatic moisture deficit during the southwestern willow flycatcher breeding season (May, June, July) at 418 breeding sites for the 1981-2010 period (blue) and 2091-2100 period, projected using the GFDL-ESM4 GCM under climate scenario SSP5-8.5.

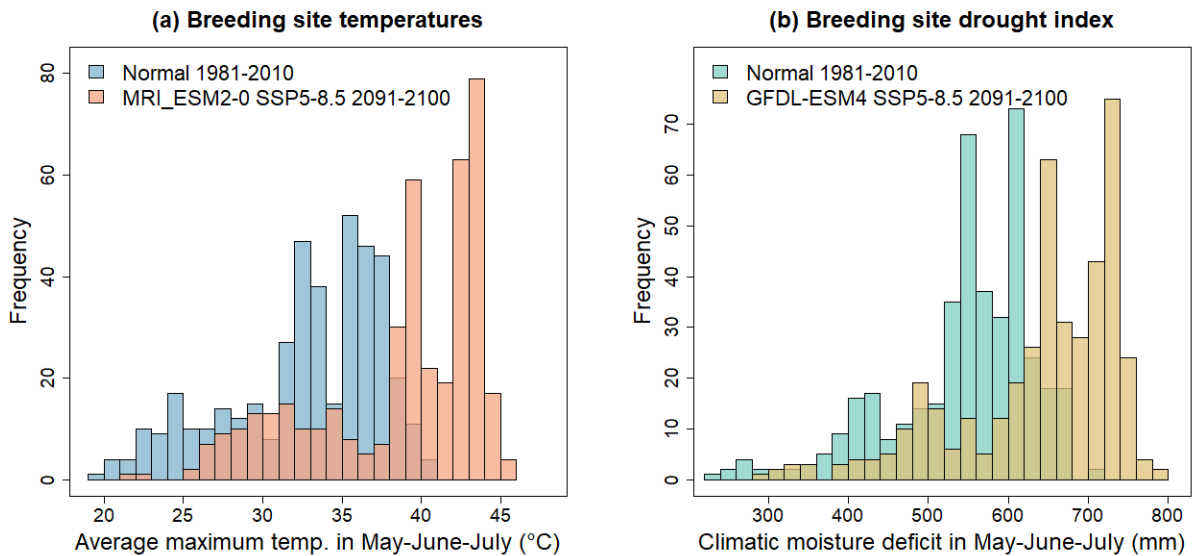

**Figure S2.** Frequency of (a) average maximum temperatures and (b) climatic moisture deficit during the southwestern willow flycatcher breeding season (May, June, July) at 418 breeding sites for the 1981-2010 period (blue) and 2091-2100 period, projected using the MRI\_ESM2-0 GCM under climate scenario SSP5-8.5.

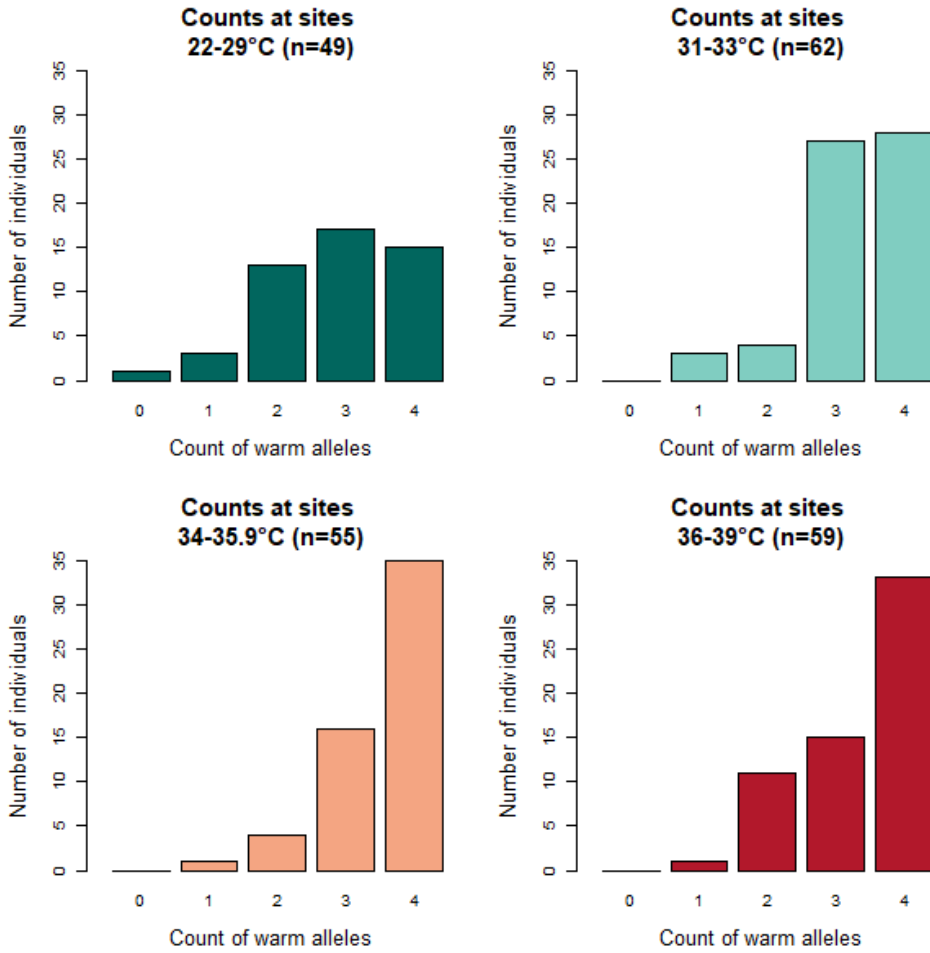

**Figure S3.** Histograms of warm-associated allele counts across site temperatures for two SNPs from 15 southwestern willow flycatcher sites and 225 individuals.

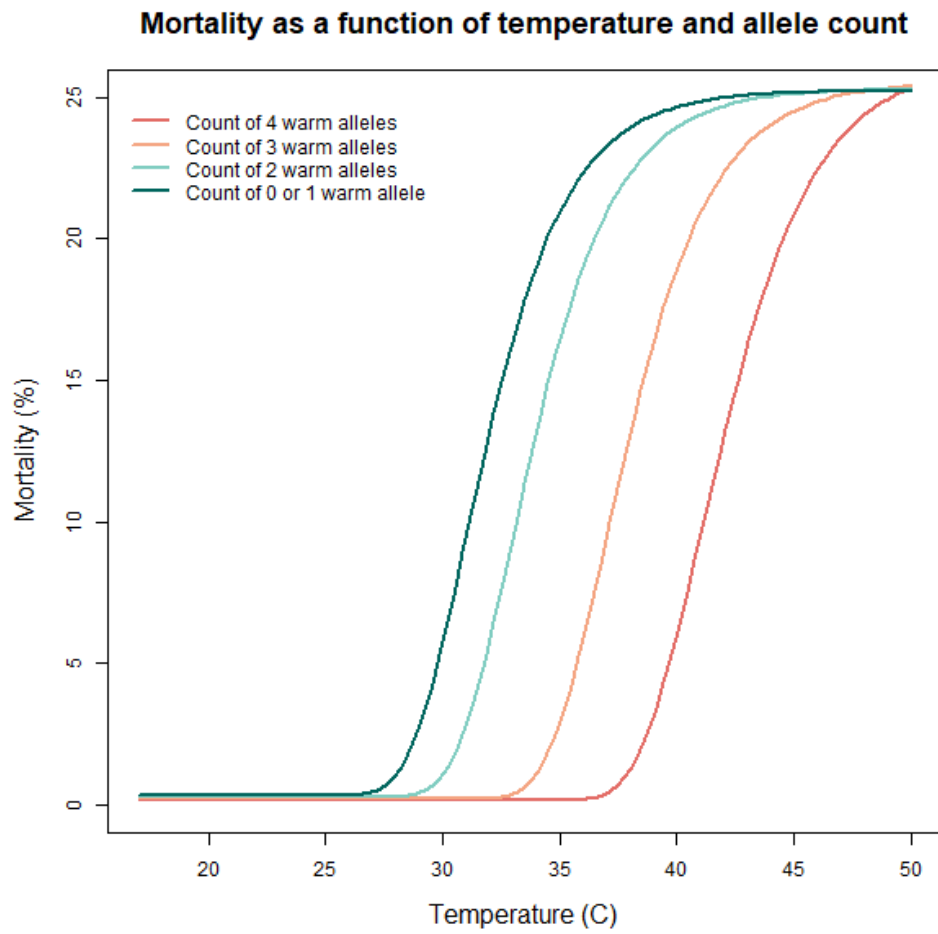

**Figure S4.** Mortality curves for warm-associated allele counts. Fitness impacts range from no mortality penalty to a 25% penalty as a function of genotype and temperature.

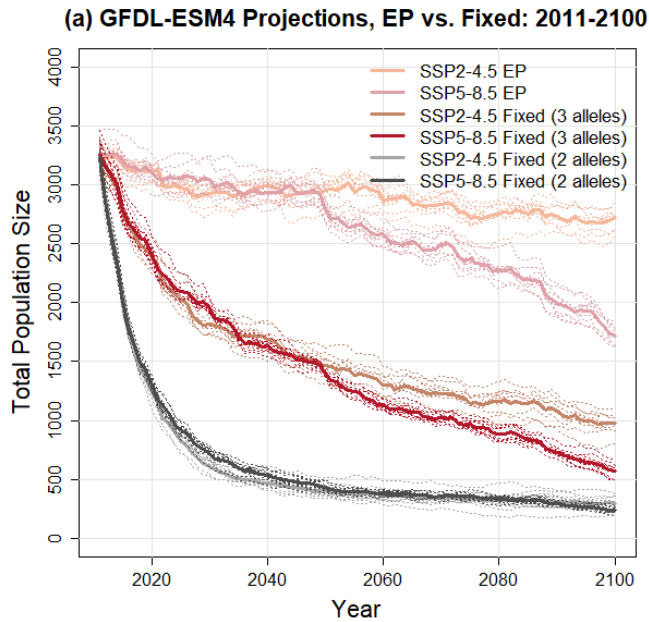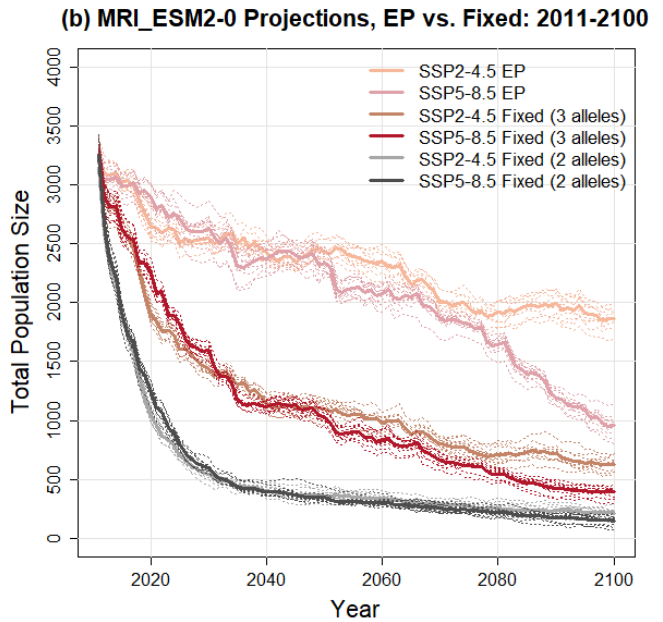

**Figure S5.** Population trajectories for southwestern willow flycatchers under variable selection due to climate change under the SSP2-4.5 and SSP5-8.5 scenarios for the (a) GFDL-ESM4 GCM and (b) MRI\_ESM2-0 GCM. Each scenario compares responses where populations can adapt to warming conditions (“EP” or evolutionary potential runs), and two cases where populations cannot adapt and are fixed for either three or two warm-associated alleles. Solid lines are the mean of 10 MC replicates (dotted lines).

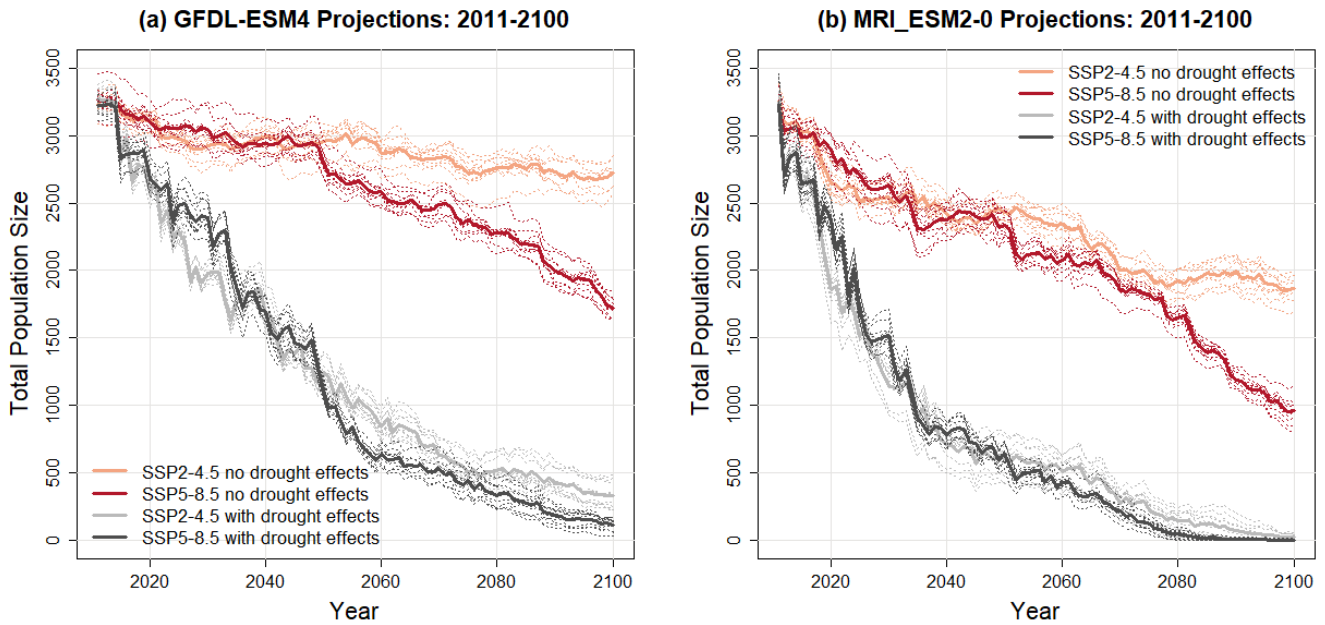

**Figure S6.** Population trajectories for southwestern willow flycatchers under variable selection due to climate change with and without drought effects on egg mortality under SSP2-4.5 and SSP5-8.5 for the (a) GFDL-ESM4 GCM and (b) MRI\_ESM2-0 GCM. Solid lines are the mean of 10 MC replicates (dotted lines).

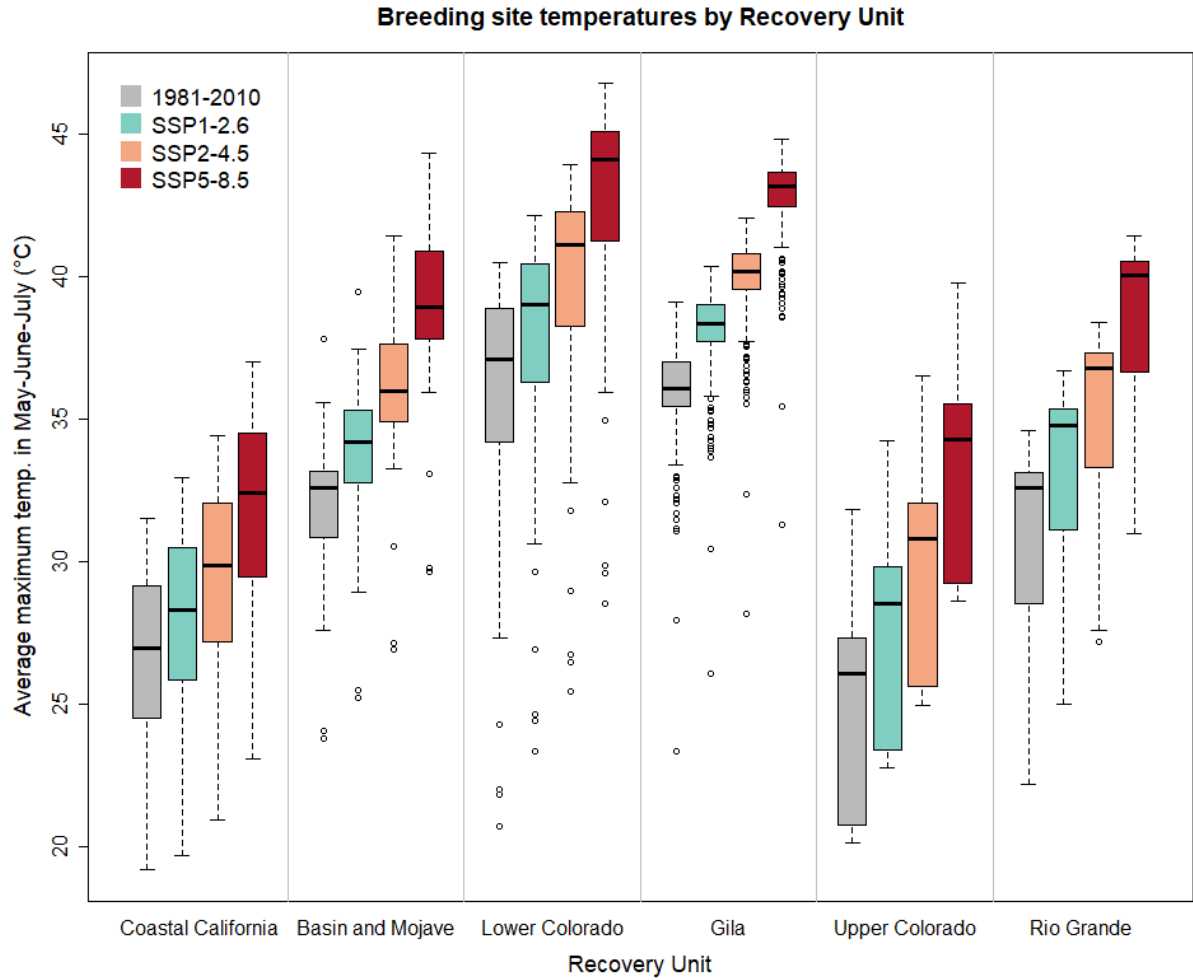

**Figure S7.** Average maximum temperatures during the breeding season by recovery unit and either climate normal or climate change scenario for the EC-Earth3 GCM.

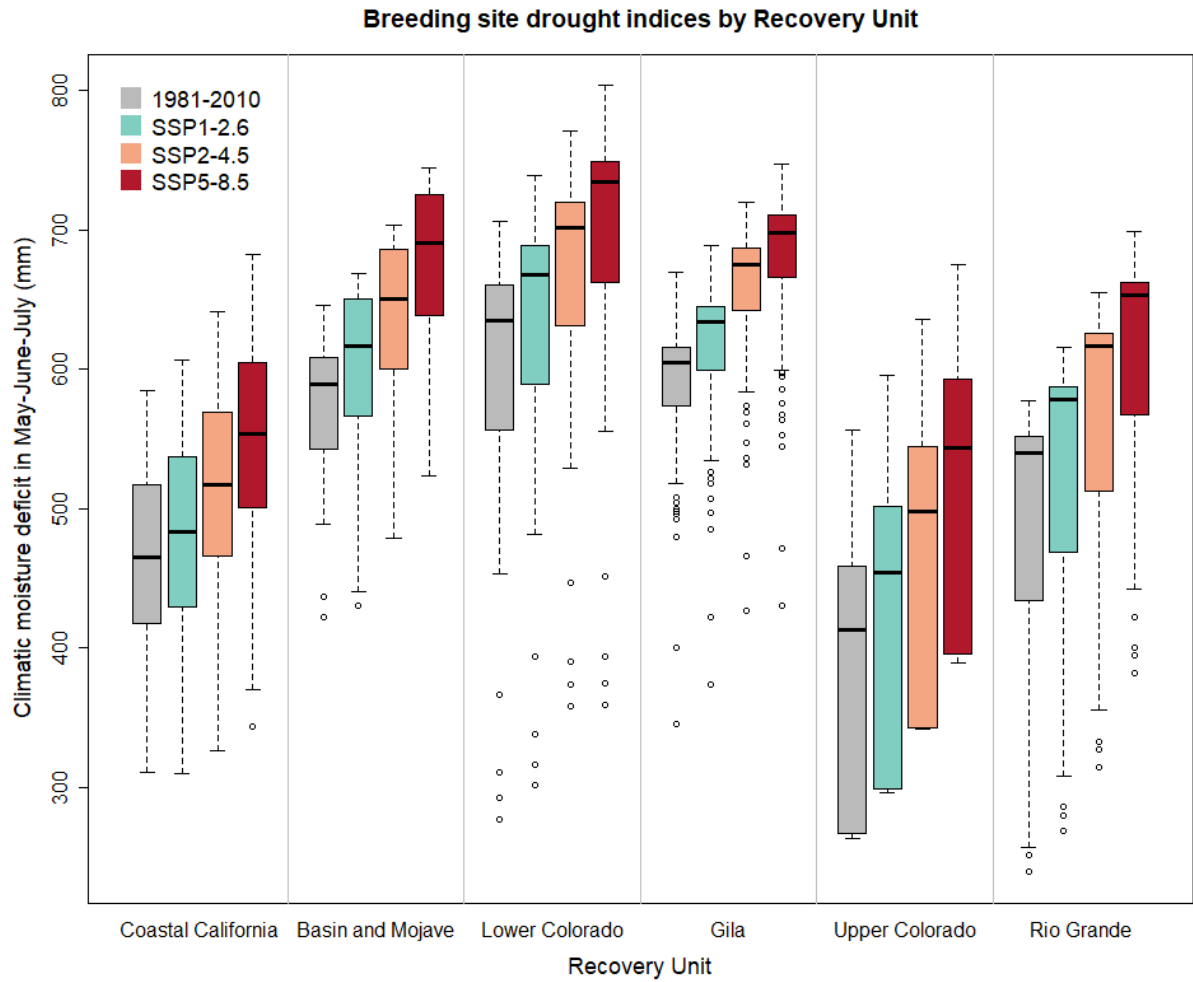

**Figure S8.** Average climatic moisture deficit during the breeding season by recovery unit and either climate normal or climate change scenario for the EC-Earth3 GCM.

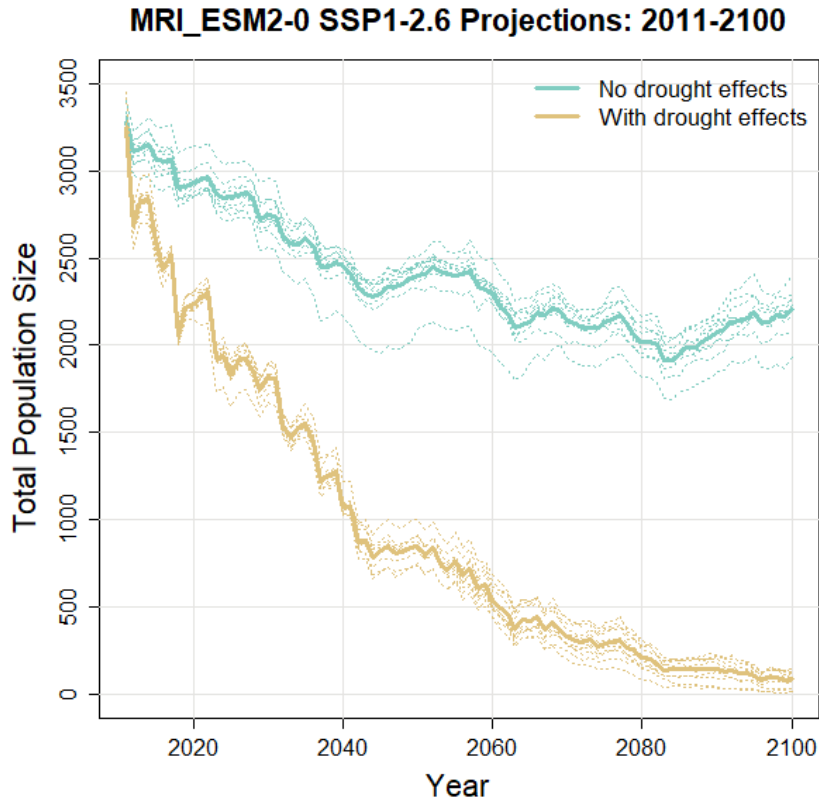

**Figure S9.** Population trajectories for southwestern willow flycatchers under variable selection due to climate change with and without drought effects on egg mortality under SSP1-2.6 for the MRI\_ESM2-0 GCM. Solid lines are the mean of 10 MC replicates (dotted lines).



**Table S1.** Demographic parameters for simulations.

| <b>Age class</b> | <b>Mean mortality</b> | <b>Mean survivorship</b> | <b>Mean seasonal fecundity</b> | <b>Per capita fecundity</b> | <b>Post-breeding per capita fecundity</b> |
|------------------|-----------------------|--------------------------|--------------------------------|-----------------------------|-------------------------------------------|
| 0                | 0.66                  | 0.34                     | 0.00                           | 0.00                        | 0.34                                      |
| 1                | 0.42                  | 0.58                     | 0.70                           | 0.58                        | 1.04                                      |
| 2                | 0.35                  | 0.65                     | 1.30                           | 1.17                        | 1.17                                      |
| 3                | 0.33                  | 0.67                     | 1.00                           | 1.21                        | 1.14                                      |
| 4                | 0.21                  | 0.79                     | 0.90                           | 1.34                        | 1.42                                      |
| 5                | 0.11                  | 0.89                     | 0.80                           | 1.60                        | 0.00                                      |

**Table S2.** Age class structure (mean and for each MC replicate) from the demography only simulation in comparison with empirical data from Paxton *et al.* (2007).

|                    | <b>MC0</b> | <b>MC1</b> | <b>MC2</b> | <b>MC3</b> | <b>MC4</b> | <b>MC5</b> | <b>MC6</b> | <b>MC7</b> | <b>MC8</b> | <b>MC9</b> | <b>Mean</b> | <b>Paxton <i>et al.</i> 2007</b> |
|--------------------|------------|------------|------------|------------|------------|------------|------------|------------|------------|------------|-------------|----------------------------------|
| <b>Second year</b> | 0.45       | 0.45       | 0.45       | 0.45       | 0.45       | 0.45       | 0.46       | 0.45       | 0.45       | 0.44       | 0.45        | 0.52                             |
| <b>Third year</b>  | 0.24       | 0.24       | 0.24       | 0.24       | 0.24       | 0.25       | 0.24       | 0.25       | 0.25       | 0.25       | 0.24        | 0.25                             |
| <b>Fourth year</b> | 0.15       | 0.14       | 0.13       | 0.15       | 0.16       | 0.14       | 0.15       | 0.15       | 0.15       | 0.15       | 0.15        | 0.09                             |
| <b>Fifth year</b>  | 0.09       | 0.09       | 0.10       | 0.10       | 0.09       | 0.09       | 0.08       | 0.09       | 0.09       | 0.10       | 0.09        | 0.07                             |
| <b>Sixth year</b>  | 0.07       | 0.07       | 0.07       | 0.07       | 0.07       | 0.07       | 0.07       | 0.07       | 0.06       | 0.07       | 0.07        | 0.04                             |

**Table S3.** Natal and adult dispersal rates (mean and for each MC replicate) from the demography only simulation in comparison with empirical data from Paxton *et al.* (2007)

| <b>Natal Dispersal</b> | <b>MC0</b> | <b>MC1</b> | <b>MC2</b> | <b>MC3</b> | <b>MC4</b> | <b>MC5</b> | <b>MC6</b> | <b>MC7</b> | <b>MC8</b> | <b>MC9</b> | <b>Mean</b> | <b>Paxton <i>et al.</i> 2007</b> |
|------------------------|------------|------------|------------|------------|------------|------------|------------|------------|------------|------------|-------------|----------------------------------|
| Site fidelity          | 0.02       | 0.03       | 0.02       | 0.02       | 0.02       | 0.02       | 0.02       | 0.02       | 0.02       | 0.02       | 0.02        | 0.02                             |
| Within drainage        | 0.95       | 0.94       | 0.96       | 0.95       | 0.95       | 0.96       | 0.95       | 0.95       | 0.95       | 0.95       | 0.95        | 0.93                             |
| Between drainage       | 0.03       | 0.03       | 0.03       | 0.03       | 0.03       | 0.02       | 0.03       | 0.03       | 0.03       | 0.02       | 0.03        | 0.06                             |

| <b>Adult Dispersal</b> | <b>MC0</b> | <b>MC1</b> | <b>MC2</b> | <b>MC3</b> | <b>MC4</b> | <b>MC5</b> | <b>MC6</b> | <b>MC7</b> | <b>MC8</b> | <b>MC9</b> | <b>Mean</b> | <b>Paxton <i>et al.</i> 2007</b> |
|------------------------|------------|------------|------------|------------|------------|------------|------------|------------|------------|------------|-------------|----------------------------------|
| Site fidelity          | 0.32       | 0.32       | 0.34       | 0.33       | 0.34       | 0.33       | 0.34       | 0.33       | 0.33       | 0.31       | 0.33        | 0.33                             |
| Within drainage        | 0.67       | 0.66       | 0.65       | 0.66       | 0.65       | 0.66       | 0.65       | 0.64       | 0.66       | 0.67       | 0.66        | 0.64                             |
| Between drainage       | 0.01       | 0.02       | 0.01       | 0.01       | 0.01       | 0.01       | 0.02       | 0.02       | 0.01       | 0.02       | 0.02        | 0.03                             |

**Table S4.** Maximum, mean, and minimum population sizes across MC replicates of all simulation scenarios, including percent decline in mean population size at 2100 compared to the starting population size of 3,258.

| <b>Simulation runs</b>   | <b>GCM</b> | <b>Climate change scenario</b> | <b>Mean population size at 2100</b> | <b>% decline from start (N=3,258)</b> | <b>Minimum population size at 2100</b> | <b>Maximum population size at 2100</b> |
|--------------------------|------------|--------------------------------|-------------------------------------|---------------------------------------|----------------------------------------|----------------------------------------|
| Demography               | None       | None                           | 4033.7                              | -24%                                  | 3855                                   | 4215                                   |
| Constant selection       | None       | None                           | 3576.9                              | -10%                                  | 3413                                   | 3678                                   |
| Climate change           | GFDL-EDM4  | SSP2-4.5                       | 2720.6                              | 16%                                   | 2565                                   | 2856                                   |
| Climate change           | EC-Earth3  | SSP2-4.5                       | 2149.1                              | 34%                                   | 1906                                   | 2305                                   |
| Climate change           | MRI-ESM2-0 | SSP2-4.5                       | 1868.6                              | 43%                                   | 1685                                   | 1983                                   |
| Climate change           | GFDL-EDM4  | SSP5-8.5                       | 1717.1                              | 47%                                   | 1615                                   | 1839                                   |
| Climate change           | EC-Earth3  | SSP5-8.5                       | 1083.8                              | 67%                                   | 992                                    | 1164                                   |
| Climate change           | MRI-ESM2-0 | SSP5-8.5                       | 958.6                               | 71%                                   | 799                                    | 1145                                   |
| No EP - Fixed 3 alleles  | GFDL-EDM4  | SSP2-4.5                       | 978.5                               | 70%                                   | 801                                    | 1089                                   |
| No EP - Fixed 3 alleles  | EC-Earth3  | SSP2-4.5                       | 637.9                               | 80%                                   | 569                                    | 689                                    |
| No EP - Fixed 3 alleles  | MRI-ESM2-0 | SSP2-4.5                       | 629.5                               | 81%                                   | 541                                    | 716                                    |
| No EP - Fixed 3 alleles  | GFDL-EDM4  | SSP5-8.5                       | 571.4                               | 82%                                   | 491                                    | 664                                    |
| No EP - Fixed 3 alleles  | EC-Earth3  | SSP5-8.5                       | 394.6                               | 88%                                   | 337                                    | 475                                    |
| No EP - Fixed 3 alleles  | MRI-ESM2-0 | SSP5-8.5                       | 391.2                               | 88%                                   | 292                                    | 454                                    |
| No EP - Fixed 2 alleles  | GFDL-EDM4  | SSP2-4.5                       | 296.7                               | 91%                                   | 188                                    | 373                                    |
| No EP - Fixed 2 alleles  | EC-Earth3  | SSP2-4.5                       | 235.7                               | 93%                                   | 158                                    | 309                                    |
| No EP - Fixed 2 alleles  | MRI-ESM2-0 | SSP2-4.5                       | 212.6                               | 93%                                   | 145                                    | 281                                    |
| No EP - Fixed 2 alleles  | GFDL-EDM4  | SSP5-8.5                       | 237.3                               | 93%                                   | 196                                    | 274                                    |
| No EP - Fixed 2 alleles  | EC-Earth3  | SSP5-8.5                       | 123.1                               | 96%                                   | 63                                     | 169                                    |
| No EP - Fixed 2 alleles  | MRI-ESM2-0 | SSP5-8.5                       | 149.6                               | 95%                                   | 71                                     | 209                                    |
| Climate change + Drought | GFDL-EDM4  | SSP2-4.5                       | 331                                 | 90%                                   | 220                                    | 491                                    |
| Climate change + Drought | EC-Earth3  | SSP2-4.5                       | 290                                 | 91%                                   | 195                                    | 365                                    |
| Climate change + Drought | MRI-ESM2-0 | SSP2-4.5                       | 20.3                                | 99%                                   | 0                                      | 51                                     |

| <b>Simulation runs</b>                    | <b>GCM</b> | <b>Climate change scenario</b> | <b>Mean population size at 2100</b> | <b>% decline from start (N=3,258)</b> | <b>Minimum population size at 2100</b> | <b>Maximum population size at 2100</b> |
|-------------------------------------------|------------|--------------------------------|-------------------------------------|---------------------------------------|----------------------------------------|----------------------------------------|
| Climate change + Drought                  | GFDL-EDM4  | SSP5-8.5                       | 114.5                               | 96%                                   | 29                                     | 166                                    |
| Climate change + Drought                  | EC-Earth3  | SSP5-8.5                       | 4.5                                 | 100%                                  | 0                                      | 16                                     |
| Climate change + Drought                  | MRI-ESM2-0 | SSP5-8.5                       | 1.1                                 | 100%                                  | 0                                      | 11                                     |
| Rapid climate change mitigation           | GFDL-EDM4  | SSP1-2.6                       | 3066.9                              | 6%                                    | 2972                                   | 3194                                   |
| Rapid climate change mitigation           | EC-Earth3  | SSP1-2.6                       | 2839.5                              | 13%                                   | 2610                                   | 3021                                   |
| Rapid climate change mitigation           | MRI-ESM2-0 | SSP1-2.6                       | 2203.9                              | 32%                                   | 1927                                   | 2400                                   |
| Rapid climate change mitigation + Drought | GFDL-EDM4  | SSP1-2.6                       | 732.4                               | 78%                                   | 596                                    | 889                                    |
| Rapid climate change mitigation + Drought | EC-Earth3  | SSP1-2.6                       | 2027.6                              | 38%                                   | 1833                                   | 2248                                   |
| Rapid climate change mitigation + Drought | MRI-ESM2-0 | SSP1-2.6                       | 83.3                                | 97%                                   | 14                                     | 141                                    |
